# Supplementary material
Source: PubMed Central journal article supplement (PMC6482929)
Supplement: JB.00611-18-s0001.pdf [file JB.00611-18-s0001.pdf]

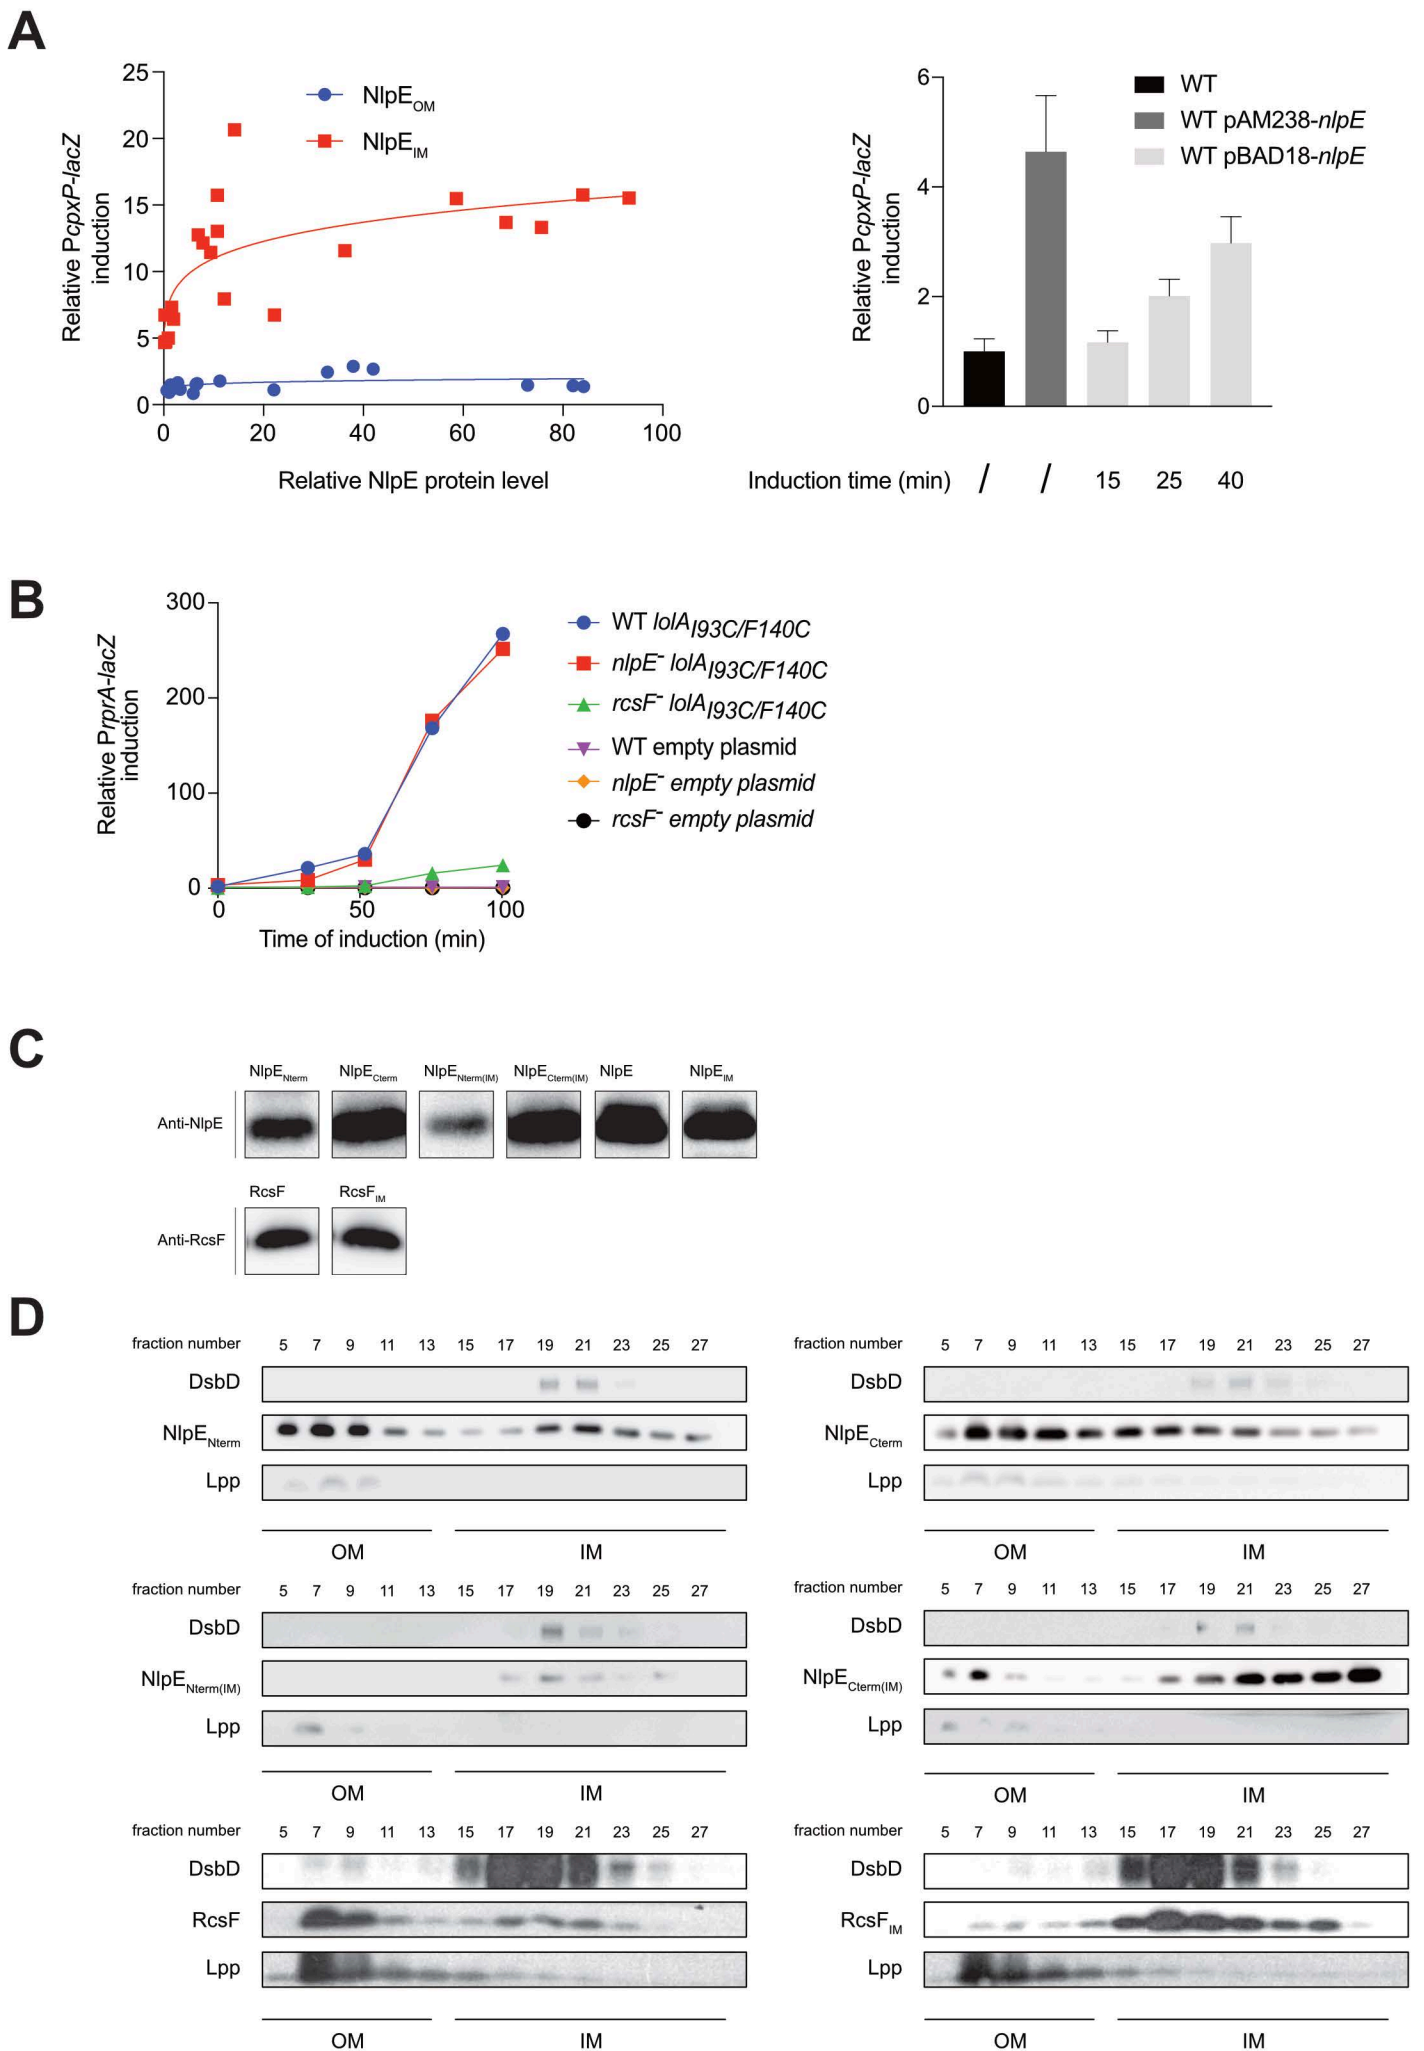

Figure S1

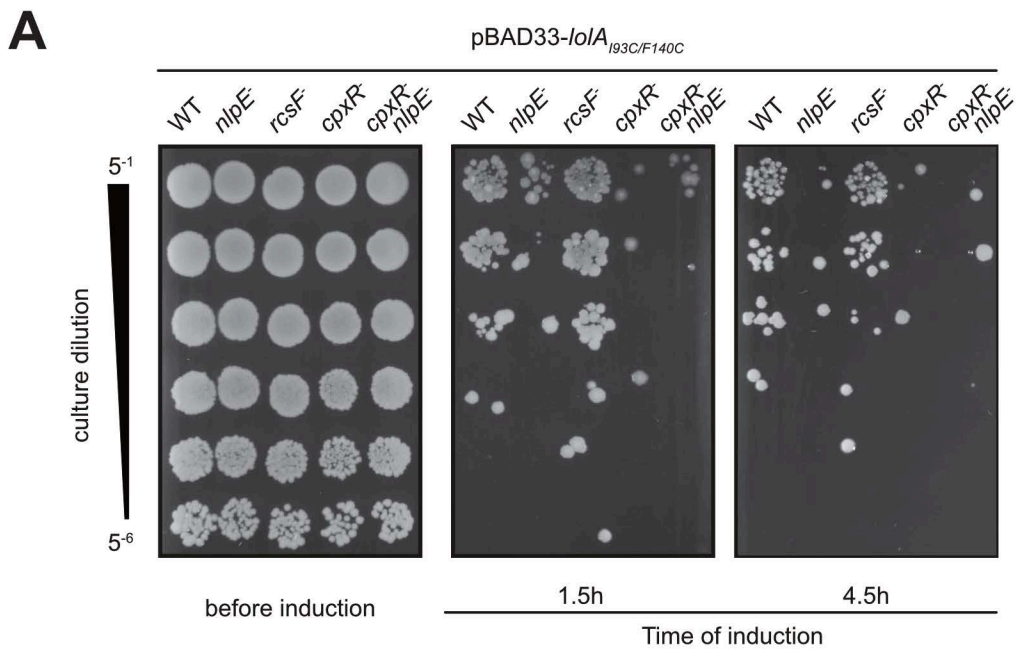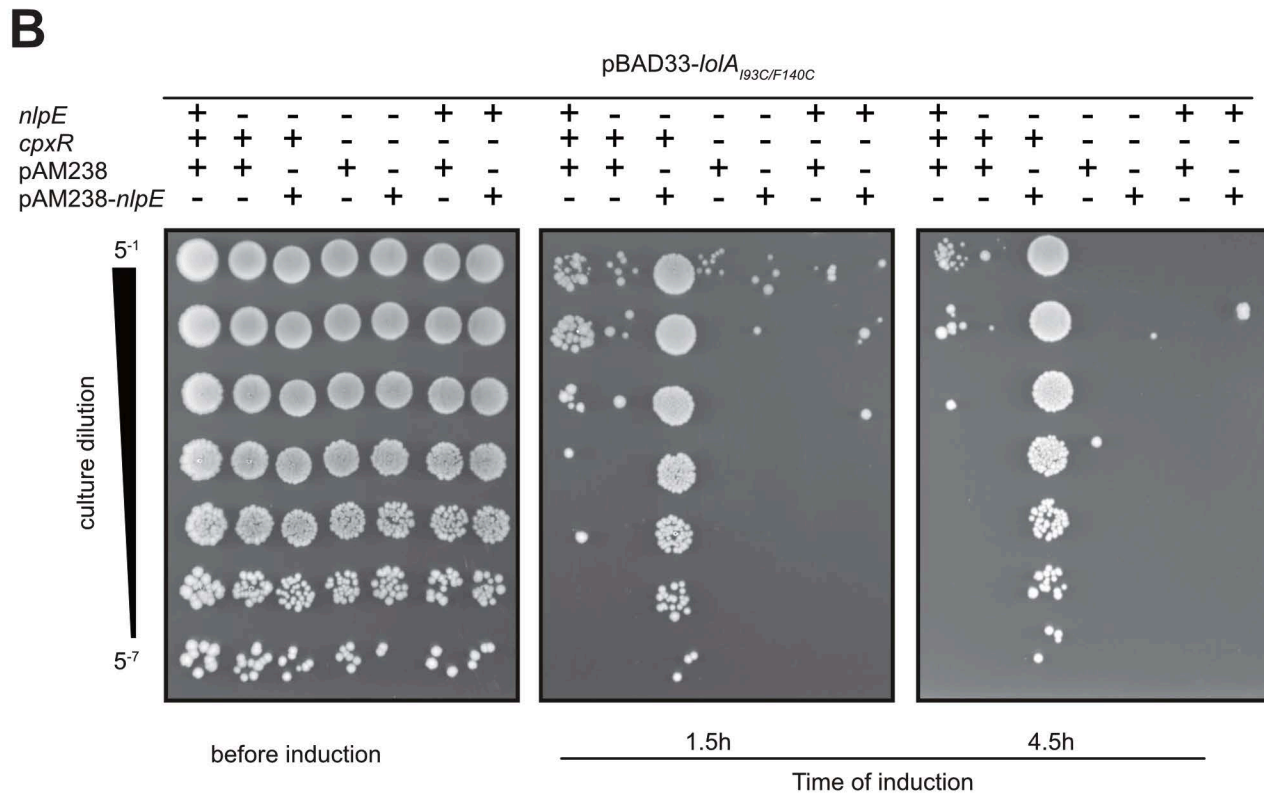

Figure S2

**SUPPLEMENTARY TABLES**

**Table S1. Strains and plasmids used in this study**

| <b>Strain name</b> | <b>Genotype</b>                                                                                           | <b>Construction method</b>                                                        | <b>Source</b>     |
|--------------------|-----------------------------------------------------------------------------------------------------------|-----------------------------------------------------------------------------------|-------------------|
| PL442              | MC4100 $\lambda$ RS88 [ <i>cpxP'</i> - <i>lacZ</i> <sup>+</sup> ] <i>rcsF::kanR</i>                       | P1 transduction of <i>rcsF::kanR</i> from the Keio collection (2) into GL43       | Pauline Leverrier |
| PL448              | MC4100 $\lambda$ RS88 [ <i>cpxP'</i> - <i>lacZ</i> <sup>+</sup> ] <i>dsbA::kanR</i>                       | P1 transduction of <i>dsbA::kanR</i> from the Keio collection (2) into GL43       | Pauline Leverrier |
| GL16 = DH300       | MG1655 D( <i>argF-lac</i> )U169 [ <i>rprA142-lacZ</i> ]                                                   |                                                                                   | (1)               |
| GL17 = PL339       | MG1655 D( <i>argF-lac</i> )U169 [ <i>rprA142-lacZ</i> ] <i>rcsF::kanR</i>                                 | P1 transduction of <i>rcsF::kanR</i> from the Keio collection (2) into GL43       | Pauline Leverrier |
| GL18               | MG1655 D( <i>argF-lac</i> )U169 [ <i>rprA142-lacZ</i> ] <i>nlpE::kanR</i>                                 | P1 transduction of <i>nlpE::kanR</i> from the Keio collection (2) into GL16       | This study        |
| GL43 = PAD282      | MC4100 $\lambda$ RS88 [ <i>cpxP'</i> - <i>lacZ</i> <sup>+</sup> ]                                         |                                                                                   | (2)               |
| GL44 = PL447       | MC4100 $\lambda$ RS88 [ <i>cpxP'</i> - <i>lacZ</i> <sup>+</sup> ] <i>nlpE::kanR</i>                       | P1 transduction of <i>nlpE::kanR</i> from the Keio collection (2) into GL43       | Pauline Leverrier |
| GL60               | MC4100 $\lambda$ RS88 [ <i>cpxP'</i> - <i>lacZ</i> <sup>+</sup> ] / pAM238- <i>nlpE</i>                   | Transformation of GL43 with pAM238- <i>nlpE</i>                                   | This study        |
| GL61               | MC4100 $\lambda$ RS88 [ <i>cpxP'</i> - <i>lacZ</i> <sup>+</sup> ] / pAM238                                | Transformation of GL43 with empty pAM238                                          | This study        |
| GL62               | MC4100 $\lambda$ RS88 [ <i>cpxP'</i> - <i>lacZ</i> <sup>+</sup> ] <i>nlpE::kanR</i> / pAM238- <i>nlpE</i> | Transformation of GL44 with empty pAM238- <i>nlpE</i>                             | (3)               |
| GL63               | MC4100 $\lambda$ RS88 [ <i>cpxP'</i> - <i>lacZ</i> <sup>+</sup> ] <i>nlpE::kanR</i> / pAM238              | Transformation of GL44 with empty pAM238                                          | This study        |
| GL64 = PL461       | MC4100 $\lambda$ RS88 [ <i>cpxP'</i> - <i>lacZ</i> <sup>+</sup> ] $\Delta$ <i>dsbA</i>                    | Transformation of PL448 with pCP20 to flip out the FRT- <i>kanR</i> -FRT cassette | Pauline Leverrier |

|              |                                                                                                                     |                                                                                                                                                                                            |                   |
|--------------|---------------------------------------------------------------------------------------------------------------------|--------------------------------------------------------------------------------------------------------------------------------------------------------------------------------------------|-------------------|
| GL65 = PL464 | MC4100 $\lambda$ RS88 [ <i>cpxP'</i> - <i>lacZ</i> <sup>+</sup> ] <i>nlpE::kan</i> $\Delta$ <i>dsbA</i>             | P1 transduction of <i>nlpE::kanR</i> from the Keio collection (2) into PL461                                                                                                               | Pauline Leverrier |
| GL73         | MC4100 $\lambda$ RS88 [ <i>cpxP'</i> - <i>lacZ</i> <sup>+</sup> ] <i>cpxR::kan</i>                                  | P1 transduction of <i>cpxR::kanR</i> from the Keio collection (2) into GL43                                                                                                                | (3)               |
| GL97         | MC4100 $\lambda$ RS88 [ <i>cpxP'</i> - <i>lacZ</i> <sup>+</sup> ] pAM238- <i>nlpE(N22DN23D)</i>                     | Transformation of GL43 with pAM238- <i>nlpE(N22DN23D)</i>                                                                                                                                  | This study        |
| GL111        | MC4100 $\lambda$ RS88 [ <i>cpxP'</i> - <i>lacZ</i> <sup>+</sup> ] <i>nlpE::kanR</i> / pAM238- <i>nlpE(Nt)</i>       | Transformation of GL44 with pAM238- <i>nlpE(Nt)</i>                                                                                                                                        | This study        |
| GL165        | MC4100 $\lambda$ RS88 [ <i>cpxP'</i> - <i>lacZ</i> <sup>+</sup> ] / pAM238- <i>nlpE(NtN22DN23D)</i>                 | Transformation of GL43 with pAM238- <i>nlpE(NtN22DN23D)</i>                                                                                                                                | This study        |
| GL146        | MC4100 $\lambda$ RS88 [ <i>cpxP'</i> - <i>lacZ</i> <sup>+</sup> ] <i>nlpE::kanR</i> / pAM238- <i>nlpE(Ct)</i>       | Transformation of GL44 with pAM238- <i>nlpE(Ct)</i>                                                                                                                                        | This study        |
| GL226        | MC4100 $\lambda$ RS88 [ <i>cpxP'</i> - <i>lacZ</i> <sup>+</sup> ] <i>nlpE::kanR</i> / pBAD18- <i>nlpE</i>           | Transformation of GL44 with pBAD18- <i>nlpE</i>                                                                                                                                            | This study        |
| GL228        | MC4100 $\lambda$ RS88 [ <i>cpxP'</i> - <i>lacZ</i> <sup>+</sup> ] <i>nlpE::kanR</i> / pBAD18- <i>nlpE(N22DN23D)</i> | Transformation of GL44 with pBAD18- <i>nlpE(N22DN23D)</i>                                                                                                                                  | This study        |
| GL229        | MC4100 $\lambda$ RS88 [ <i>cpxP'</i> - <i>lacZ</i> <sup>+</sup> ] $\Delta$ <i>dsbA</i> <i>nlpE::nlpE(C51AC54A)</i>  | $\lambda$ Red recombineering <sup>a</sup> at the <i>nlpE</i> locus in GL64 of <i>nlpE(C51AC54A)</i> , amplified with primers GL74 and GL75 with pET28- <i>nlpE(C51AC54A)</i> as a template | This study        |
| GL245        | MC4100 $\lambda$ RS88 [ <i>cpxP'</i> - <i>lacZ</i> <sup>+</sup> ] / pAM238- <i>rcsF</i>                             | Transformation of GL43 with pAM238- <i>rcsF</i>                                                                                                                                            | (3)               |
| GL252        | MC4100 $\lambda$ RS88 [ <i>cpxP'</i> - <i>lacZ</i> <sup>+</sup> ] <i>nlpE::nlpE(C51AC54A)</i>                       | $\lambda$ Red recombineering <sup>a</sup> at the <i>nlpE</i> locus in GL43 of <i>nlpE(C51AC54A)</i> , amplified with primers GL74 and GL75 with pET28-                                     | This study        |

|       |                                                                                                                            |                                                                                                                                                                                                 |            |
|-------|----------------------------------------------------------------------------------------------------------------------------|-------------------------------------------------------------------------------------------------------------------------------------------------------------------------------------------------|------------|
|       |                                                                                                                            | <i>nlpE(C51AC54A)</i> as a template                                                                                                                                                             |            |
| GL285 | MC4100 $\lambda$ RS88 [ <i>cpxP'</i> - <i>lacZ</i> <sup>+</sup> ] / pAM238- <i>rcsF(CDD)</i>                               | Transformation of GL43 with pAM238- <i>rcsF(CDD)</i>                                                                                                                                            | This study |
| GL372 | MC4100 $\lambda$ RS88 [ <i>cpxP'</i> - <i>lacZ</i> <sup>+</sup> ]<br><i>nlpE::nlpE(C165AC231A)</i><br>$\Delta$ <i>dsbA</i> | $\lambda$ Red recombineering <sup>a</sup> at the <i>nlpE</i> locus in GL64 of <i>nlpE(C165AC231A)</i> , amplified with primers GL74 and GL75 with pAM238- <i>nlpE(C165AC231A)</i> as a template | This study |
| GL375 | MC4100 $\lambda$ RS88 [ <i>cpxP'</i> - <i>lacZ</i> <sup>+</sup> ]<br><i>nlpE::nlpE(C165AC231A)</i>                         | $\lambda$ Red recombineering <sup>a</sup> at the <i>nlpE</i> locus in GL43 of <i>nlpE(C165AC231A)</i> , amplified with primers GL74 and GL75 with pAM238- <i>nlpE(C165AC231A)</i> as a template | This study |
| GL378 | MC4100 $\lambda$ RS88 [ <i>cpxP'</i> - <i>lacZ</i> <sup>+</sup> ] $\Delta$ <i>cpxR</i>                                     | Transformation of GL73 with pCP20 to flip out the FRT- <i>kanR</i> -FRT cassette                                                                                                                | This study |
| GL442 | MC4100 $\lambda$ RS88 [ <i>cpxP'</i> - <i>lacZ</i> <sup>+</sup> ] / pBAD33                                                 | Transformation of GL43 with empty pBAD33                                                                                                                                                        | This study |
| AD34  | MC4100 $\lambda$ RS88 [ <i>cpxP'</i> - <i>lacZ</i> <sup>+</sup> ] / pBAD33- <i>lolA(I115CF162C)</i>                        | Transformation of GL43 with pBAD33- <i>lolA(I115CF162C)</i>                                                                                                                                     | This study |
| AD35  | MC4100 $\lambda$ RS88 [ <i>cpxP'</i> - <i>lacZ</i> <sup>+</sup> ] <i>nlpE::kanR</i> / pBAD33- <i>lolA(I115CF162C)</i>      | Transformation of GL44 with pBAD33- <i>lolA(I115CF162C)</i>                                                                                                                                     | This study |
| AD50  | MG1655 D( <i>argF-lac</i> )U169 [ <i>rprA142-lacZ</i> ] / pBAD33- <i>lolA(I115CF162C)</i>                                  | Transformation of GL16 with pBAD33- <i>lolA(I115CF162C)</i>                                                                                                                                     | This study |
| AD51  | MG1655 D( <i>argF-lac</i> )U169 [ <i>rprA142-lacZ</i> ] <i>rcsF::kan</i> / pBAD33- <i>lolA(I115CF162C)</i>                 | Transformation of GL17 with pBAD33- <i>lolA(I115CF162C)</i>                                                                                                                                     | This study |

|       |                                                                                                                                       |                                                                      |            |
|-------|---------------------------------------------------------------------------------------------------------------------------------------|----------------------------------------------------------------------|------------|
| AD52  | MG1655 D(argF-lac)U169 [ <i>rprA142-lacZ</i> ] <i>nlpE::kan</i> / pBAD33- <i>lolA(I115CF162C)</i>                                     | Transformation of GL18 with pBAD33- <i>lolA(I115CF162C)</i>          | This study |
| AD54  | MC4100 $\lambda$ RS88 [ <i>cpxP'-lacZ<sup>+</sup></i> ] <i>rcsF::kanR</i> / pBAD33- <i>lolA(I115CF162C)</i>                           | Transformation of PL442 with pBAD33- <i>lolA(I115CF162C)</i>         | This study |
| AD57  | MC4100 $\lambda$ RS88 [ <i>cpxP'-lacZ<sup>+</sup></i> ] <i>nlpE::kanR</i> / pBAD33                                                    | Transformation of GL44 with empty pBAD33                             | This study |
| AD63  | MC4100 $\lambda$ RS88 [ <i>cpxP'-lacZ<sup>+</sup></i> ] <i>nlpE::kanR</i> / pBAD33- <i>lolA(I115CF162C)</i> / pAM238                  | Transformation of AD35 with empty pAM238                             | This study |
| AD64  | MC4100 $\lambda$ RS88 [ <i>cpxP'-lacZ<sup>+</sup></i> ] <i>nlpE::kanR</i> / pBAD33- <i>lolA(I115CF162C)</i> / pAM238- <i>nlpE</i>     | Transformation of AD35 with pAM238- <i>nlpE</i>                      | This study |
| AD112 | MC4100 $\lambda$ RS88 [ <i>cpxP'-lacZ<sup>+</sup></i> ] <i>nlpE::kanR</i> / pAM238- <i>nlpE</i> / pASKIBA-16- <i>Strep-cpxA(peri)</i> | Transformation of GL62 with pASKIBA-16- <i>Strep-cpxA(peri)</i>      | This study |
| AD121 | MC4100 $\lambda$ RS88 [ <i>cpxP'-lacZ<sup>+</sup></i> ] <i>nlpE::kanR</i> / pAM238- <i>nlpE</i> / pASKIBA-16- <i>cpxA(peri)</i>       | Transformation of GL62 with pASKIBA-16- <i>cpxA(peri)</i>            | This study |
| AD155 | MC4100 $\lambda$ RS88 [ <i>cpxP'-lacZ<sup>+</sup></i> ] <i>cpxR::kanR</i> / pCDFDuet $\alpha196 \omega197$                            | Transformation of GL73 with pCDFDuet $\alpha196 \omega197$           | This study |
| AD159 | MC4100 $\lambda$ RS88 [ <i>cpxP'-lacZ<sup>+</sup></i> ] <i>cpxR::kanR</i> / pCDFDuet $\alpha196-nlpE \omega197-cpxA$                  | Transformation of GL73 with pCDFDuet $\alpha196-nlpE \omega197-cpxA$ | This study |
| AD160 | MC4100 $\lambda$ RS88 [ <i>cpxP'-lacZ<sup>+</sup></i> ] <i>cpxR::kanR</i> / pCDFDuet $\alpha196 \omega197-cpxA$                       | Transformation of GL73 with pCDFDuet $\alpha196 \omega197-cpxA$      | This study |
| AD161 | MC4100 $\lambda$ RS88 [ <i>cpxP'-lacZ<sup>+</sup></i> ] <i>cpxR::kanR</i> / pCDFDuet $\alpha196-nlpE \omega197$                       | Transformation of GL73 with pCDFDuet $\alpha196-nlpE \omega197$      | This study |

|       |                                                                                                                                         |                                                                              |            |
|-------|-----------------------------------------------------------------------------------------------------------------------------------------|------------------------------------------------------------------------------|------------|
| AD162 | MC4100 $\lambda$ RS88 [ <i>cpxP'</i> - <i>lacZ</i> +] <i>nlpE::kanR</i> / pAM238- <i>nlpE</i> / pASKIBA-16                              | Transformation of GL62 with empty pASKIBA-16                                 | This study |
| AD165 | MC4100 $\lambda$ RS88 [ <i>cpxP'</i> - <i>lacZ</i> +] <i>nlpE::kanR</i> / pAM238- <i>nlpE(Nt)</i> / pASKIBA-16- <i>Strep-cpxA(peri)</i> | Transformation of GL111 with pASKIBA-16- <i>Strep-cpxA(peri)</i>             | This study |
| AD166 | MC4100 $\lambda$ RS88 [ <i>cpxP'</i> - <i>lacZ</i> +] <i>nlpE::kanR</i> / pAM238- <i>nlpE(Nt)</i> / pASKIBA-16- <i>cpxA(peri)</i>       | Transformation of GL111 with pASKIBA-16- <i>cpxA(peri)</i>                   | This study |
| AD168 | MC4100 $\lambda$ RS88 [ <i>cpxP'</i> - <i>lacZ</i> +] <i>nlpE::kanR</i> / pAM238- <i>nlpE(Nt)</i> / pASKIBA-16                          | Transformation of GL111 with empty pASKIBA-16                                | This study |
| AD171 | MC4100 $\lambda$ RS88 [ <i>cpxP'</i> - <i>lacZ</i> <sup>+</sup> ] / pAM238- <i>nlpE(Nt)</i>                                             | Transformation of GL43 with pAM238- <i>nlpE(Nt)</i>                          | This study |
| AD172 | MC4100 $\lambda$ RS88 [ <i>cpxP'</i> - <i>lacZ</i> <sup>+</sup> ] / pAM238- <i>nlpE(Ct)</i>                                             | Transformation of GL43 with pAM238- <i>nlpE(Ct)</i>                          | This study |
| AD173 | MC4100 $\lambda$ RS88 [ <i>cpxP'</i> - <i>lacZ</i> +] <i>rcsF::kanR</i> / pBAD33                                                        | Transformation of PL442 with empty pBAD33                                    | This study |
| AD174 | MG1655 D(argF- <i>lac</i> )U169 [ <i>rprA142-lacZ</i> ] <i>nlpE::kanR</i>                                                               | Transformation of GL18 with empty pBAD33                                     | This study |
| AD175 | MG1655 D(argF- <i>lac</i> )U169 [ <i>rprA142-lacZ</i> ] <i>rcsF::kanR</i>                                                               | Transformation of GL17 with empty pBAD33                                     | This study |
| AD178 | MC4100 $\lambda$ RS88 [ <i>cpxP'</i> - <i>lacZ</i> <sup>+</sup> ] $\Delta$ <i>cpxR</i> / pBAD33- <i>lolA(I115CF162C)</i>                | Transformation of GL378 with pBAD33- <i>lolA(I115CF162C)</i>                 | This study |
| AD179 | MC4100 $\lambda$ RS88 [ <i>cpxP'</i> - <i>lacZ</i> <sup>+</sup> ] $\Delta$ <i>cpxR nlpE::kan</i> / pBAD33- <i>lolA(I115CF162C)</i>      | Transformation of AD180 with pBAD33- <i>lolA(I115CF162C)</i>                 | This study |
| AD180 | MC4100 $\lambda$ RS88 [ <i>cpxP'</i> - <i>lacZ</i> <sup>+</sup> ] $\Delta$ <i>cpxR nlpE::kan</i>                                        | P1 transduction of <i>nlpE::kanR</i> from the Keio collection (2) into GL378 | This study |
| AD181 | MC4100 $\lambda$ RS88 [ <i>cpxP'</i> - <i>lacZ</i> <sup>+</sup> ] $\Delta$ <i>cpxR nlpE::kan</i> / pBAD33-                              | Transformation of AD179 with empty pAM238                                    | This study |

|        |                                                                                                                                                                            |                                                                                                           |                                               |
|--------|----------------------------------------------------------------------------------------------------------------------------------------------------------------------------|-----------------------------------------------------------------------------------------------------------|-----------------------------------------------|
|        | <i>lolA(I115CF162C)</i> /<br>pAM238                                                                                                                                        |                                                                                                           |                                               |
| AD182  | MC4100 $\lambda$ RS88 [ <i>cpxP'</i> - <i>lacZ</i> <sup>+</sup> ] $\Delta$ <i>cpxR nlpE::kan</i> /<br>pBAD33-<br><i>lolA(I115CF162C)</i> /<br>pAM238- <i>nlpE</i>          | Transformation of<br>AD179 with pAM238-<br><i>nlpE</i>                                                    | This study                                    |
| AD183  | MC4100 $\lambda$ RS88 [ <i>cpxP'</i> - <i>lacZ</i> <sup>+</sup> ] $\Delta$ <i>cpxR</i> / pBAD33-<br><i>lolA(I115CF162C)</i> /<br>pAM238                                    | Transformation of<br>AD178 with empty<br>pAM238                                                           | This study                                    |
| AD184  | MC4100 $\lambda$ RS88 [ <i>cpxP'</i> - <i>lacZ</i> <sup>+</sup> ] $\Delta$ <i>cpxR</i> / pBAD33-<br><i>lolA(I115CF162C)</i> /<br>pAM238- <i>nlpE</i>                       | Transformation of<br>AD178 with pAM238-<br><i>nlpE</i>                                                    | This study                                    |
| AD185  | MC4100 $\lambda$ RS88 [ <i>cpxP'</i> - <i>lacZ</i> <sup>+</sup> ] / pBAD33-<br><i>lolA(I115CF162C)</i> /<br>pAM238                                                         | Transformation of<br>AD34 with empty<br>pAM238                                                            | This study                                    |
| AD187  | MC4100 $\lambda$ RS88 [ <i>cpxP'</i> - <i>lacZ</i> <sup>+</sup> ] / pAM238-<br><i>nlpE(CtN22DN23D)</i>                                                                     | Transformation of<br>GL43 with pAM238-<br><i>nlpE(CtN22DN23D)</i>                                         | This study                                    |
| AD191  | MC4100 $\lambda$ RS88 [ <i>cpxP'</i> - <i>lacZ</i> <sup>+</sup> ] <i>cpxR::kanR</i> /<br>pCDFDuet <i><math>\alpha</math>196-nlpE</i><br><i><math>\omega</math>197-rcsC</i> | Transformation of<br>GL73 with pCDFDuet<br><i><math>\alpha</math>196-nlpE <math>\omega</math>197-rcsC</i> | This study                                    |
| AD192  | MC4100 $\lambda$ RS88 [ <i>cpxP'</i> - <i>lacZ</i> <sup>+</sup> ] <i>cpxR::kanR</i> /<br>pCDFDuet <i><math>\alpha</math>196-rcsF</i><br><i><math>\omega</math>197-cpxA</i> | Transformation of<br>GL73 with pCDFDuet<br><i><math>\alpha</math>196-rcsF <math>\omega</math>197-cpxA</i> | This study                                    |
| AD200  | MC4100 $\lambda$ RS88 [ <i>cpxP'</i> - <i>lacZ</i> <sup>+</sup> ] <i>nlpE::kanR</i> /<br>pAM238 / pASKIBA-16-<br><i>cpxA(peri)</i>                                         | Transformation of<br>GL63 with pASKIBA-<br>16- <i>cpxA(peri)</i>                                          | This study                                    |
| AD201  | MC4100 $\lambda$ RS88 [ <i>cpxP'</i> - <i>lacZ</i> <sup>+</sup> ] <i>nlpE::kanR</i> /<br>pAM238 / pASKIBA-16                                                               | Transformation of<br>GL63 with empty<br>pASKIBA-16                                                        | This study                                    |
| JS471  | MG1655 D( <i>argF</i> -<br><i>lac</i> )U169 [ <i>rprA142-lacZ</i> ] /<br>pBAD33                                                                                            | Transformation of<br>GL16 with empty<br>pBAD33                                                            | Joanna<br>Szewczyk                            |
| CH1990 | MG1655 <i>yfaH::cat-sacB</i>                                                                                                                                               |                                                                                                           | Diarmaid<br>Hugues<br>(Uppsala<br>University) |



| Plasmid                         | Features, usage, resistance                                                                                                                                                                   | Construction method                                                                                                               | Source            |
|---------------------------------|-----------------------------------------------------------------------------------------------------------------------------------------------------------------------------------------------|-----------------------------------------------------------------------------------------------------------------------------------|-------------------|
| pCP20                           | FLP <sup>+</sup> , $\lambda$ cI857 <sup>+</sup> , $\lambda$ PR Rep <sup>ts</sup> , ampicillin, Chlor <sup>R</sup> (the vector is eliminated after transformation by overnight growth at 37°C) |                                                                                                                                   | (4)               |
| pAM238                          | IPTG-regulated P <sub>lac</sub> (in this study: constitutive expression without inducer), pSC101-based vector, Spec <sup>R</sup>                                                              |                                                                                                                                   | (5)               |
| pAM238- <i>nlpE</i>             | Expression of wild-type <i>nlpE</i> from pAM238, Spec <sup>R</sup>                                                                                                                            | Cloning of <i>nlpE</i> ORF and 28 upstream base pairs into pAM238 using KpnI and PstI                                             | Joanna Szewczyk   |
| pAM238- <i>nlpE(N22DN23D)</i>   | Expression of <i>nlpE<sub>IM</sub></i> from pAM238, Spec <sup>R</sup>                                                                                                                         | Site-directed mutagenesis on pAM238- <i>nlpE</i> using primers GL48 and GL49                                                      | This study        |
| pAM238- <i>nlpE(Nt)</i>         | Expression of N-terminal domain of <i>nlpE</i> from pAM238, Spec <sup>R</sup>                                                                                                                 | Cloning of <i>nlpE(Nt)</i> ORF, amplified from pAM238- <i>nlpE</i> with primers GL32 and GL35, into pAM238 using KpnI and HindIII | This study        |
| pAM238- <i>nlpE(NtN22DN23D)</i> | Expression of N-terminal domain of <i>nlpE<sub>IM</sub></i> from pAM238, Spec <sup>R</sup>                                                                                                    | Site-directed mutagenesis on pAM238- <i>nlpE(Nt)</i> using primers GL48 and GL49                                                  | This study        |
| pAM238- <i>nlpE(Ct)</i>         | Expression of C-terminal domain of <i>nlpE</i> from pAM238, Spec <sup>R</sup>                                                                                                                 | Site-directed mutagenesis on pAM238- <i>nlpE</i> using primers GL65 and GL66                                                      | This study        |
| pAM238- <i>nlpE(CtN22DN23D)</i> | Expression of C-terminal domain of <i>nlpE<sub>IM</sub></i> from pAM238, Spec <sup>R</sup>                                                                                                    | Site-directed mutagenesis on pAM238- <i>nlpE(Ct)</i> using primers AD169 and AD170                                                | This study        |
| pAM238- <i>nlpE(C165AC231A)</i> | Template for $\lambda$ Red recombineering                                                                                                                                                     | Site-directed mutagenesis (2 rounds) on pAM238- <i>nlpE</i> using primers GL183-GL184, then GL185-GL186                           | This study        |
| pET28- <i>nlpE(C51AC54A)</i>    | Template for $\lambda$ Red recombineering                                                                                                                                                     |                                                                                                                                   | Pauline Leverrier |

|                                             |                                                                                                |                                                                                                                                   |                  |
|---------------------------------------------|------------------------------------------------------------------------------------------------|-----------------------------------------------------------------------------------------------------------------------------------|------------------|
| pBAD18                                      | Arabinose-inducible P <sub>BAD</sub> , pBR322-based, Amp <sup>R</sup>                          |                                                                                                                                   | (6)              |
| pBAD18- <i>nlpE</i>                         | Expression of <i>nlpE</i> from pBAD18, Amp <sup>R</sup>                                        | Cloning of <i>nlpE</i> ORF, amplified from GL15 with primers GL25 and GL32, into pBAD18 using KpnI and HindIII                    | This study       |
| pBAD18- <i>nlpE(N22DN23D)</i>               | Expression of <i>nlpE<sub>IM</sub></i> from pBAD18, Amp <sup>R</sup>                           | Restriction digestion of pAM238- <i>nlpE(N22DN23D)</i> with KpnI and HindIII, ligation into pBAD18                                | This study       |
| pAM238- <i>rscF</i> =pSC202                 | Expression of wild-type <i>rscF</i> from pAM238, Spec <sup>R</sup>                             |                                                                                                                                   | (7)              |
| pAM238- <i>rscF(CDD)</i> =pSC202(S17D/M18D) | Expression of <i>rscF<sub>IM</sub></i> from pAM238, Spec <sup>R</sup>                          |                                                                                                                                   | (7)              |
| pBAD33                                      | Arabinose-inducible P <sub>BAD</sub> , pACYC184-based, Cm <sup>R</sup>                         |                                                                                                                                   | (6)              |
| pBAD33- <i>lolA</i>                         | Used as template for site-directed mutagenesis                                                 |                                                                                                                                   | Joanna Szewczyk  |
| pBAD33- <i>lolA(I115CF162C)</i>             |                                                                                                | Site-directed mutagenesis (two rounds) of pBAD33- <i>lolA</i> with primers AD43-AD44, then AD45 and AD46                          | This study       |
| pASKIBA-16                                  | tet-inducible P <sub>BAD</sub> , f1-based, contains Amp <sup>R</sup>                           |                                                                                                                                   | IBA lifesciences |
| pASKIBA-16- <i>Strep-cpxA(peri)</i>         | Expression of Strep-tagged periplasmic domain of <i>cpxA</i> from pASKIBA-16, Amp <sup>R</sup> | Gibson assembly of PCR product with primers AD74 and AD77, pASKIBA-16 as template and primers AD75 and AD76 with GL43 as template | This study       |
| pASKIBA-16- <i>cpxA(peri)</i>               | Expression of untagged periplasmic domain of <i>cpxA</i> from pASKIBA-16, Amp <sup>R</sup>     | Gibson assembly of PCR product with primers AD78 and AD81, pASKIBA-16 as template and primers AD79 and AD80 with GL43 as template | This study       |

|                                                                        |                                                                                                                                                              |                                                                                                                                                                                                                             |                                                                      |
|------------------------------------------------------------------------|--------------------------------------------------------------------------------------------------------------------------------------------------------------|-----------------------------------------------------------------------------------------------------------------------------------------------------------------------------------------------------------------------------|----------------------------------------------------------------------|
| pCDFDuet $\alpha 196$<br>$\omega 197$                                  | Co-expression of the $\alpha 196$ and the $\omega 197$ fragment of the TEM $\beta$ -lactamase from the pCDFDuet plasmid                                      |                                                                                                                                                                                                                             | Gift from Shu Quan (East China University of Science and Technology) |
| pCDFDuet $\alpha 196$ -<br><i>spy(dimer)</i> $\omega 197$ - <i>Im7</i> | Used as template for cloning                                                                                                                                 |                                                                                                                                                                                                                             | Gift from Shu Quan (East China University of Science and Technology) |
| pCDFDuet $\alpha 196$<br>$\omega 197$ - <i>Im7</i>                     | Used as template for cloning                                                                                                                                 |                                                                                                                                                                                                                             | Gift from Shu Quan (East China University of Science and Technology) |
| pCDFDuet $\alpha 196$ -<br><i>spy(dimer)</i> $\omega 197$              | Used as template for cloning                                                                                                                                 |                                                                                                                                                                                                                             | Gift from Shu Quan (East China University of Science and Technology) |
| pCDFDuet $\alpha 196$ - <i>nlpE</i><br>$\omega 197$ - <i>cpxA</i>      | Co-expression of the $\alpha 196$ and the $\omega 197$ fragment of the TEM $\beta$ -lactamase fused to <i>nlpE</i> and <i>cpxA</i> from the pCDFDuet plasmid | Gibson assembly of PCR products with primers AD130-AD131 and AD134-AD135 with pCDFDuet $\alpha 196$ - <i>spy(dimer)</i> $\omega 197$ - <i>Im7</i> as template and primers AD132-AD133 and AD136-AD137 with GL43 as template | This study                                                           |
| pCDFDuet $\alpha 196$ - <i>nlpE</i><br>$\omega 197$                    | Co-expression of the $\alpha 196$ (fused to <i>nlpE</i> ) and the $\omega 197$ fragment of the TEM $\beta$ -lactamase from the pCDFDuet plasmid              | Gibson assembly of PCR products with primers AD142-AD143 with pCDFDuet $\alpha 196$ - <i>spy(dimer)</i> $\omega 197$ as template and primers AD136-AD137 with GL43 as template                                              | This study                                                           |
| pCDFDuet $\alpha 196$<br>$\omega 197$ - <i>cpxA</i>                    | Co-expression of the $\alpha 196$ and the $\omega 197$ (fused to <i>cpxA</i> ) fragment of the                                                               | Gibson assembly of PCR products with primers AD138-AD139 with pCDFDuet $\alpha 196$ $\omega 197$ - <i>Im7</i>                                                                                                               | This study                                                           |

|                                                                |                                                                                                                                                              |                                                                                                                                                                                                                             |            |
|----------------------------------------------------------------|--------------------------------------------------------------------------------------------------------------------------------------------------------------|-----------------------------------------------------------------------------------------------------------------------------------------------------------------------------------------------------------------------------|------------|
|                                                                | TEM $\beta$ -lactamase from the pCDFDuet plasmid                                                                                                             | as template and primers AD132-AD133 with GL43 as template                                                                                                                                                                   |            |
| pCDFDuet $\alpha 196$ - <i>nlpE</i> $\omega 197$ - <i>rscC</i> | Co-expression of the $\alpha 196$ and the $\omega 197$ fragment of the TEM $\beta$ -lactamase fused to <i>nlpE</i> and <i>rscC</i> from the pCDFDuet plasmid | Gibson assembly of PCR products with primers AD168-AD131 and AD171-AD135 with pCDFDuet $\alpha 196$ - <i>spy(dimer)</i> $\omega 197$ - <i>Im7</i> as template and primers AD158-AD159 and AD136-AD137 with GL43 as template | This study |
| pCDFDuet $\alpha 196$ - <i>rscF</i> $\omega 197$ - <i>cpxA</i> | Co-expression of the $\alpha 196$ and the $\omega 197$ fragment of the TEM $\beta$ -lactamase fused to <i>rscF</i> and <i>cpxA</i> from the pCDFDuet plasmid | Gibson assembly of PCR products with primers AD164-AD165 with pCDFDuet $\alpha 196$ - <i>nlpE</i> $\omega 197$ - <i>cpxA</i> as template and primers AD162-AD163 with GL43 as template                                      | This study |

<sup>a</sup>2-step  $\lambda$ Red recombineering (4): In a first step, *nlpE::cat-sacB* was amplified using primers GL72 and GL73 with CH1990 as template and incorporated by  $\lambda$ Red recombineering in the indicated host strain. In a second step,  $\lambda$ Red recombineering was used to replace *cat-sacB* by the indicated version of *nlpE*, a PCR product obtained with the indicated primers and template, leaving a scarless replacement of the native *nlpE*.

**TABLE S2. Primers used in this study.**

| <b>Primer</b> | <b>5'-3' sequence</b>                                                         |
|---------------|-------------------------------------------------------------------------------|
| GL25          | AAAAAAAAAGCTTTTACTGCCCAAACACTACTGCAAT                                         |
| GL32          | AAAAAAGGTACCAGCGGTCGGGAATAAAAAGAAGGAATGGATGGTG<br>AAAAAAGCGATAGTGA            |
| GL35          | AAAAAAAAAGCTTTTACGCTTCCAGCGTATAGTTGA                                          |
| GL48          | TCTTTACTCTGATGGGATGTGATGATCGGGCCGAAGTCGA                                      |
| GL49          | TCGACTTCGGCCCGATCATCACATCCCATCAGAGTAAAGA                                      |
| GL65          | CTCTGATGGGATGTAATAATGCACAATCCAGTTTACCTATG                                     |
| GL66          | CATAGGTAAACTGGATTGTGCATTATTACATCCCATCAGAG                                     |
| GL72          | GATGCGCGGCAAAGTGCGCAGCGGTCGGGAATAAAAAGAAGGAATG<br>GATGAAAATGAGACGTTGATCGGCACG |
| GL73          | ATATATCCTTCTGGCCTGTTTTGCGTTTGTCTGTCTCAAGACGGGT<br>AATCAAAGGGAAAACGTCCA        |
| GL74          | GATGCGCGGCAAAGTGCGCAGCGGTCGGGAATAAAAAGA                                       |
| GL75          | ATATATCCTTCTGGCCTGTTTTGCGTTTGTCTGTCTCAAGACGGGT<br>ACTGCCCAAACACTACTGCAAT      |
| GL183         | TGCGGCGACCTTCACTGATGCCGCGACCGGAAAACGTTTC                                      |
| GL184         | GAAACGTTTTCCGGTCGCGGCATCAGTGAAGGTCGCCGCA                                      |
| GL185         | ATTTTACCCCAACCAGGATGCCAGTAGTTTGGGGCAGTAA                                      |
| GL186         | TTACTGCCCAAACACTACTGGCATCCTGGTTGGGGTAAAAT                                     |
| AD43          | CGCCGTTTATGCTGTGTGCCCGCAACCAGTCCAG                                            |
| AD44          | CTGGACTGGTTGCGGGCACACAGCATAAACGGCG                                            |
| AD45          | GATGGCACAATCCATCAGTGTAGCGCGGTGGAGCAGG                                         |
| AD46          | CCTGCTCCACCGCGCTACACTGATGGATTGTGCCATC                                         |
| AD74          | ATCTGGCGTGAATCGAGCTTACCACCACCACCAGATT                                         |
| AD75          | AATCTGGTGGTGGTGGTGGTAAGCTCGATTCACGCCAGAT                                      |
| AD76          | GGGACCGCGGTCTCGGCTTAGCGGTCAAACAGTAAGTTAA                                      |
| AD77          | ACTTACTGTTTGACCGCTAAGCCGAGACCGCGGTCCCGAA                                      |

|       |                                                       |
|-------|-------------------------------------------------------|
| AD78  | ATCTGGCGTGAATCGAGCTTGGCCTGCGCTACGGTAGCGA              |
| AD79  | TCGCTACCGTAGCGCAGGCCAAGCTCGATTCACGCCAGAT              |
| AD80  | GGGACCGCGGTCTCGGCTTAGCGGTCAAACAGTAAGTTAA              |
| AD81  | ACTTACTGTTTGACCGCTAAGCCGAGACCGCGGTCCCGAA              |
| AD130 | ATCTGGCGTGAATCGAGCTTAGAACCACCACCACCAGAAC              |
| AD131 | GCAGTAGTTTGGGGCAGTAAGCAGATCTCAATTGGATATC              |
| AD132 | GTTCTGGTGGTGGTGGTTCTAAGCTCGATTCACGCCAGAT              |
| AD133 | TGGTGATGGCTGCTGCCTTAGCGGTCAAACAGTAAGTTAA              |
| AD134 | ACTTACTGTTTGACCGCTAAGGCAGCAGCCATCACCATCA              |
| AD135 | TCGACTTCGGCCCGATTATTAGAACCACCACCACCAGAAC              |
| AD136 | GTTCTGGTGGTGGTGGTTCTAATAATCGGGCCGAAGTCGA              |
| AD137 | GATATCCAATTGAGATCTGCTTACTGCCCCAACTACTGC               |
| AD138 | TTAACTTACTGTTTGACCGCTAAGGCAGCAGCCATCACCA              |
| AD139 | ATCTGGCGTGAATCGAGCTTAGAACCACCACCACCAGAAC              |
| AD142 | ATTGCAGTAGTTTGGGGCAGTAAGCAGATCTCAATTGGAT              |
| AD143 | TCGACTTCGGCCCGATTATTAGAACCACCACCACCAGAAC              |
| AD158 | GTTCTGGTGGTGGTGGTTCTCATCAGCGAGAATCGGAAATTCG           |
| AD159 | TGGTGATGGCTGCTGCCTTAGCGAATGCGTTCAGCACCT               |
| AD162 | TTCTGGTGGTGGTGGTTCTATGCGTGCTTTACCGATCTGT              |
| AD163 | GATATCCAATTGAGATCTGCTCATTTCGCCGTAATGTAAAGCGC          |
| AD164 | GCGCTTAACATTACGGCGAAATGAGCAGATCTCAATTGGATATC          |
| AD165 | ACAGATCGGTAAAGCACGCATAGAACCACCACCACCAGAA              |
| AD168 | CGATTCTCGCTGATGAGAACCACCACCACCAGAACCACCACCACCC<br>AAT |
| AD169 | GATGATGCACAATCCAGTTTACCTATGACGCCGATGA                 |
| AD170 | TGGATTGTGCATCATCACATCCCATCAGAGTAAAGAGG                |
| AD171 | ATTCGCTAAGGCAGCAGCCATCACCATCATCA                      |

1 **LEGEND FOR THE SUPPLEMENTARY INFORMATION**

2

3 **Figure S1. Sensitivity of the Cpx system towards NlpE localization and protein amounts, and**

4 **levels of NlpE truncated variants. A.** The Cpx system is sensitive to low levels of IM-localized

5 NlpE. *Left:* Expression of *nlpE<sub>OM</sub>* (GL226) or *nlpE<sub>IM</sub>* (GL228) from the pBAD18 plasmid was

6 induced for various amounts of time (ranging from 0 to 60 minutes of induction) with 0.2 % L-

7 arabinose, then both  $\beta$ -galactosidase activity from *PcpxP-lacZ* and protein levels (via

8 quantification of western blot analysis) were measured for each sample. Each point is a single

9 sample measurement normalized to wild-type activity and protein level (GL43). Fit lines are non-

10 linear log-log regression calculated with GraphPad Prism. *Right:*  $\beta$ -galactosidase activity from

11 *PcpxP-lacZ* was measured in wild-type cells (GL43), in WT cells expressing *nlpE* from the

12 pAM238 plasmid (GL60) or in WT cells expressing *nlpE* from the pBAD18 plasmid (GL226), in

13 the same timeframe as the experiment on the left panel to compare constitutive *nlpE*

14 overexpression from the pAM238 plasmid with *nlpE* expression conditions used in panel A. All

15 values were normalized to the average activity obtained for GL43. Bars represent the average of

16 normalized values from at least three independent clones. Error bars: standard deviations. **B.**

17 Inducing the expression of *lola<sub>I93C/F140C</sub>* leads to NlpE-independent and RcsF-dependent activation

18 of the Rcs system. Wild-type (AD50), *rscF::kanR* (AD51), *nlpE::kanR* (AD52) cells expressing

19 *lola<sub>I93C/F140C</sub>*, as well as wild-type (JS471), *nlpE::kanR* cells (AD174) and *rscF::kanR* cells

20 (AD173) carrying the empty plasmid were induced with 0.2 % L-arabinose.  $\beta$ -galactosidase

21 activity from *PrprA-lacZ* (a specific reporter of the Rcs system) was measured periodically. All

22 values were normalized to the average activity obtained for JS471 after 150 min of growth. This

23 graph is representative of at least 3 independent measurements. **C. Top:** Western blot using an

24 anti-NlpE antibody showing the levels of NlpE<sub>Nterm</sub>, NlpE<sub>Cterm</sub>, NlpE<sub>Nterm(IM)</sub>, NlpE<sub>Cterm(IM)</sub>, NlpE  
25 and NlpE<sub>IM</sub>, (strains GL165, AD171, AD172, AD187, GL60 and GL97 respectively). Shown is a  
26 representative image of 3 biological replicates. *Bottom*: Western blot using an anti-RcsF antibody  
27 showing that RcsF and RcsF<sub>IM</sub>, are detected at similar levels (strains GL165, AD171, AD172,  
28 AD187, GL60 and GL97 respectively). Shown is a representative image of 3 biological replicates.

29 **D.** Cell lysates from cells expressing NlpE<sub>Nterm</sub>, NlpE<sub>Cterm</sub>, NlpE<sub>Nterm(IM)</sub>, NlpE<sub>Cterm(IM)</sub>, RcsF and  
30 RcsF<sub>IM</sub> (GL165, AD171, AD172, AD187, GL245 and GL285, respectively) were subjected to a  
31 two-step sucrose gradient to collect the membrane fraction and separate the OM from the IM. Final  
32 fractions were analyzed by Western blot using antibodies raised against NlpE or RcsF, Lpp  
33 (control for OM localization) and DsbD (IM control). Figure shows bands of NlpE or RcsF, Lpp  
34 and DsbD detected by Western blot, and the subcellular localizations are shown below the  
35 corresponding fractions for each strain. Data are from a representative experiment out of two  
36 repeats. Note that some of the overexpressed variants are not fully confined to one membrane; this  
37 is likely due to overexpression since this localization “leakiness” was less observed when NlpE  
38 was produced at native levels (3). Nevertheless, these data confirm that we could indeed modify  
39 the subcellular distribution of different constructs of NlpE and RcsF as expected from the  
40 lipoproteins sorting rules.

41

42 **Figure S2. NlpE and the Cpx stress response provide a fitness advantage when lipoprotein**  
43 **sorting defects occur.** **A.** Cpx confers a fitness advantage during lipoprotein sorting defects.  
44 *lola<sub>I93C/F140C</sub>* was expressed from the pBAD33 plasmid in wild-type (AD34), *nlpE::kanR* (AD35),  
45 *rscF::kanR* (AD54),  $\Delta$ *cpxR* (AD178),  $\Delta$ *cpxR nlpE::kanR* (AD179) cells before proceeding with  
46 serial dilution as indicated and spotting on LB agar to assess viability. This image is representative



47 of at least 3 independent replicates. **B.** The fitness defect due to *lolA*<sub>I93C/F140C</sub> can be complemented  
48 by overexpressing *nlpE*, but only if the Cpx can be activated (*i.e.* in the presence of *cpxR*).  
49 *lolA*<sub>I93C/F140C</sub> was expressed from the pBAD33 plasmid in the following strains (see Table S1 for  
50 more information): AD184, AD63, AD64, AD181, AD182, AD183, AD184, before proceeding  
51 with serial dilution as indicated and spotting on LB agar. This image is representative of at least 3  
52 independent replicates.

53

54 **Table S1. Strains and plasmids used in this study.** Includes relevant genotypes and features,  
55 construction methods and sources.

56

57 **Table S2. Primers used in this study.** Includes primer names and sequences.

58

## 59 REFERENCES FOR THE SUPPLEMENTARY INFORMATION

- 60 1. **Majdalani N, Hernandez D, Gottesman S.** 2002. Regulation and mode of action of the second  
61 small RNA activator of RpoS translation, RprA. *Mol Microbiol* **46**:813–826.
- 62 2. **DiGiuseppe PA, Silhavy TJ.** 2003. Signal detection and target gene induction by the CpxRA two-  
63 component system. *J Bacteriol* **185**:2432–2440.
- 64 3. **Delhaye A, Collet JF, Laloux G.** 2016. Fine-Tuning of the Cpx Envelope Stress Response Is  
65 Required for Cell Wall Homeostasis in *Escherichia coli*. *MBio* **7**:e00047–16.
- 66 4. **Cherepanov PP, Wackernagel W.** 1995. Gene disruption in *Escherichia coli*: TcR and KmR  
67 cassettes with the option of Flp-catalyzed excision of the antibiotic-resistance determinant. *Gene*  
68 **158**:9–14.
- 69 5. **Gil D, Bouché JP.** 1991. Cole1-type vectors with fully repressible replication. *Gene* **105**:17–22.
- 70 6. **Guzman LM, Belin D, Carson MJ, Beckwith J.** 1995. Tight regulation, modulation, and high-  
71 level expression by vectors containing the arabinose PBAD promoter. *J Bacteriol* **177**:4121–4130.
- 72 7. **Cho S-H, Szewczyk J, Pesavento C, Zietek M, Banzhaf M, Roszczenko P, Asmar A, Laloux G,**  
73 **Hov A-K, Leverrier P, Van der Henst C, Vertommen D, Typas A, Collet JF.** 2014. Detecting  
74 Envelope Stress by Monitoring  $\beta$ -Barrel Assembly. *Cell* **159**:1652–1664.
